# Supplementary material for: Copy Number Variations of Four Y-Linked Genes in Swamp Buffaloes
Source: PubMed Central journal article supplement (PMC7023270; doi:10.3390/ani10010031), 2019-12-22
Supplement: animals-10-00031-s001.pdf [file animals-10-00031-s001.pdf]

## Supplementary

**Table S1.** The information of primers used in qPCR

| Primer name    | Sequence                       | Annealing (°C) | Tm Primer efficiency          | Size (bp) |
|----------------|--------------------------------|----------------|-------------------------------|-----------|
| <i>BTF3</i> F  | 5'-AACCAGGAGAAACTCGCCAA-3'     | 64             | 1.98 at 64°C;                 | 166       |
| <i>BTF3</i> R  | 5'-TTCGGTGAAATGCCCTCTCG-3'     |                | 1.95 at 63°C;<br>2.02 at 62°C |           |
| <i>SRY</i> F   | 5'-GATTTATTTGGGAGAAGGCTTC-3'   | 62             | 1.98                          | 242       |
| <i>SRY</i> R   | 5'-GTGGGGTTGGTGTGTTTGTGTC-3'   |                |                               |           |
| <i>DBY</i> F   | 5'-AGCAAAGCACAGAGGGGAG-3'      | 62             | 1.96                          | 250       |
| <i>DBY</i> R   | 5'-GTCAAGAGGAAGACACAGTTAC-3'   |                |                               |           |
| <i>UTY</i> F   | 5'-GGCGTCTTAGTCACTTTATCACAT-3' | 62             | 2.07                          | 193       |
| <i>UTY</i> R   | 5'-CAAGGGACTGAGGGACATAAGC-3'   |                |                               |           |
| <i>OFD1Y</i> F | 5'-CGACATCTCAATGAAGAAAGGG-3'   | 62             | 2.02                          | 231       |
| <i>OFD1Y</i> R | 5'-CTCACTCTGTGTGTGTTTGCTC-3'   |                |                               |           |

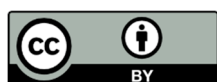

© 2019 by the authors. Submitted for possible open access publication under the terms and conditions of the Creative Commons Attribution (CC BY) license (<http://creativecommons.org/licenses/by/4.0/>).
